# Supplementary material
Source: PubMed Central journal article supplement (PMC1751335)

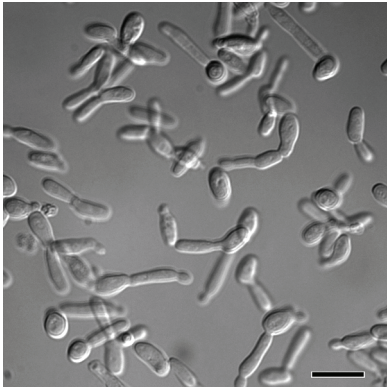

A) *bem3Δ/Δ rga2Δ/Δ*

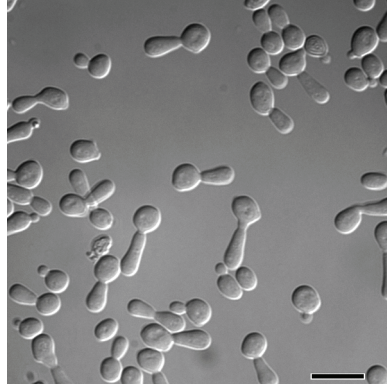

B) *bem3Δ/Δ rga2Δ/Δ*:  
*PMET3-RGA2*

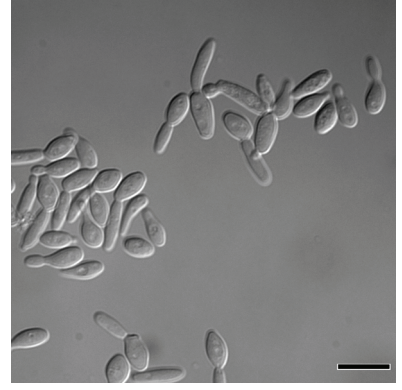

C) *bem3Δ/Δ rga2Δ/Δ*:  
*PMET3-BEM3*

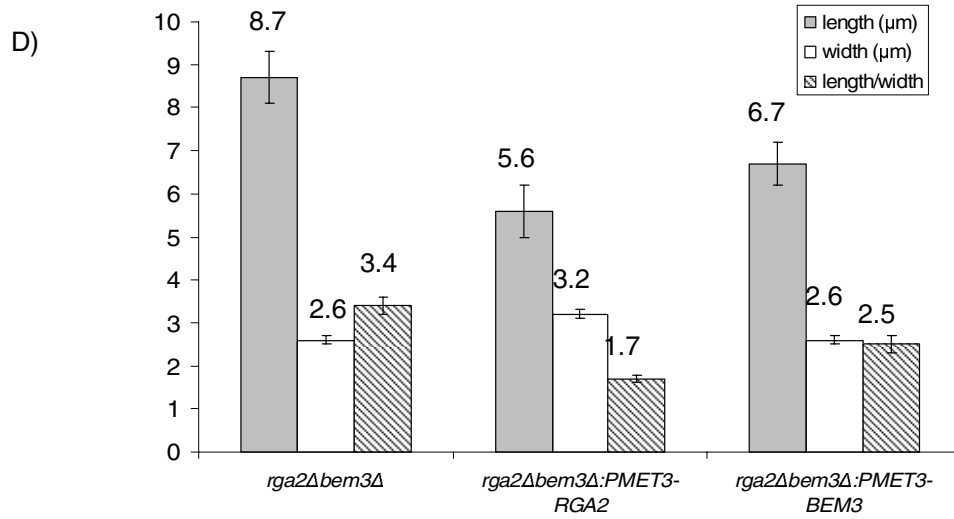

Supplement: mbc_E06-05-0411_1.pdf [file mbc_E06-05-0411_1.pdf]

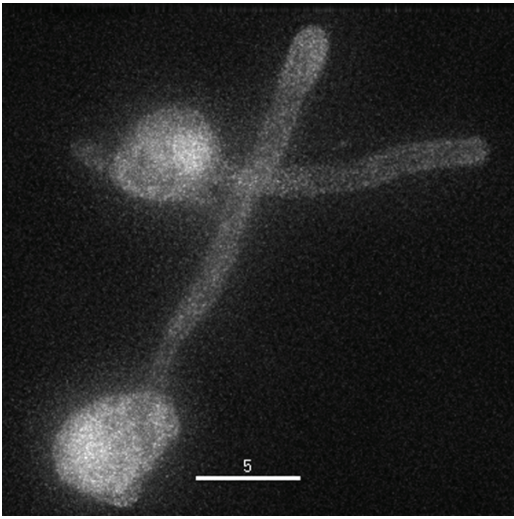

Rdi1-YFP Hyphae

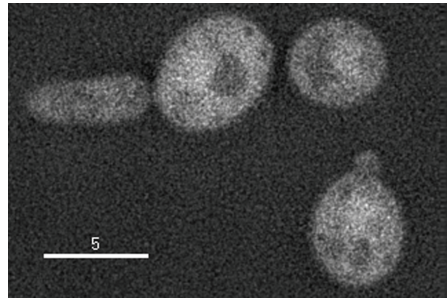

Rdi1-YFP Pseudohyphae

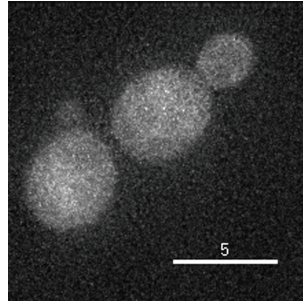

Rdi1-YFP Yeast

Supplement: mbc_E06-05-0411_2.pdf [file mbc_E06-05-0411_2.pdf]
